# Supplementary material for: A Simple Add-and-Display Method for Immobilisation of Cancer Drug on His-tagged Virus-like Nanoparticles for Controlled Drug Delivery
Source: Sci Rep. 2017 Jul 13;7:5303. doi: 10.1038/s41598-017-05525-4 (PMC5509718; doi:10.1038/s41598-017-05525-4)
Supplement: Supplementary file 1 — Supplementary Information [file 41598_2017_5525_MOESM1_ESM.pdf]

## Supplementary Information

### A Simple Add-and-Display Method for Immobilisation of Cancer Drug on His-tagged Virus-like Nanoparticles for Controlled Drug Delivery

Roya Biabanikhankahdani<sup>1</sup>, Saadi Bayat<sup>2</sup>, Kok Lian Ho<sup>3</sup>, Noorjahan Banu Mohamed Alitheen<sup>4,5</sup>, Wen Siang Tan<sup>\*1,5</sup>

<sup>1</sup>Department of Microbiology, Faculty of Biotechnology and Biomolecular Sciences, Universiti Putra Malaysia, 43400 UPM Serdang, Selangor, Malaysia.

<sup>2</sup>Department of Chemistry, Faculty of Science, Universiti Putra Malaysia, 43400 UPM Serdang, Selangor, Malaysia.

<sup>3</sup>Department of Pathology, Faculty of Medicine and Health Sciences, Universiti Putra Malaysia, 43400 UPM Serdang, Selangor, Malaysia.

<sup>4</sup>Department of Cell and Molecular Biology, Faculty of Biotechnology and Biomolecular Sciences, Universiti Putra Malaysia, 43400 UPM Serdang, Selangor, Malaysia.

<sup>5</sup>Institute of Bioscience, Universiti Putra Malaysia, 43400 UPM Serdang, Selangor, Malaysia

## Synthesis and Analysis of NTA-DOX

### 1. Synthesis of compound 1

Alanine (0.025 mmol; Sigma-Aldrich) in acetonitrile (ACN, 30 mL) was added with K<sub>2</sub>CO<sub>3</sub> (2 g) and ethylbromoacetate (0.03 mmol). The mixture was refluxed for 20 h and the reaction is shown in Supplementary Figure S1. The reaction progress was monitored using thin-layer chromatography (TLC; Et:n-Hex, 1:1) on silica gel plates (60F-254) and visualized using KMnO<sub>4</sub>. The reaction was completed after 20 h. Then, the solvent was evaporated under vacuum using a rotary evaporator. The product was extracted and purified using EtOAc (2×30 mL) and water (30 mL). The organic layer was then washed with brine and water. The organic layer was

dried with Na<sub>2</sub>SO<sub>4</sub> and evaporated to obtain precipitates of compound **1**. The yield of the product was 95%.

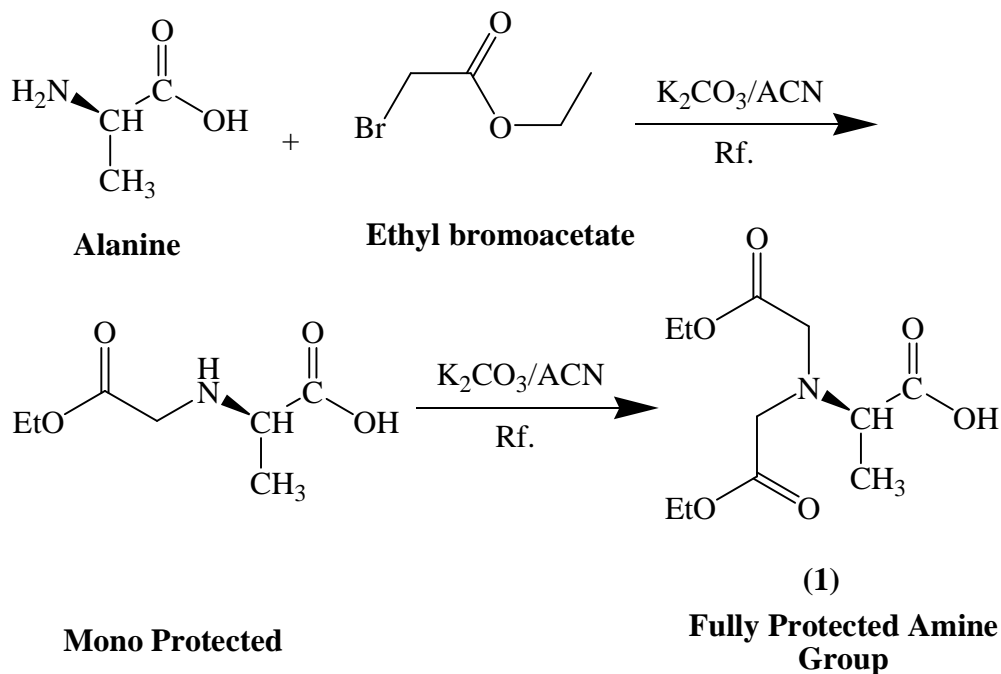

**Supplementary Figure S1.** Synthesis of fully protected amine group of alanine.  
ACN, acetonitrile; K<sub>2</sub>CO<sub>3</sub>, potassium carbonate; Rf., reflux.

Compound **1** was analysed using a nuclear magnetic resonance (NMR) spectrophotometer (Varian, 500 MHz). All <sup>1</sup>H and <sup>13</sup>C NMR spectra (Supplementary Figure S2) were recorded at 25°C in methanol-d<sub>4</sub>. Chemical shifts (δ) were reported in parts per million (ppm). Multiplicities are abbreviated as follows: s = singlet, d = doublet, t = triplet, q = quartet, m = multiplet.

(a)

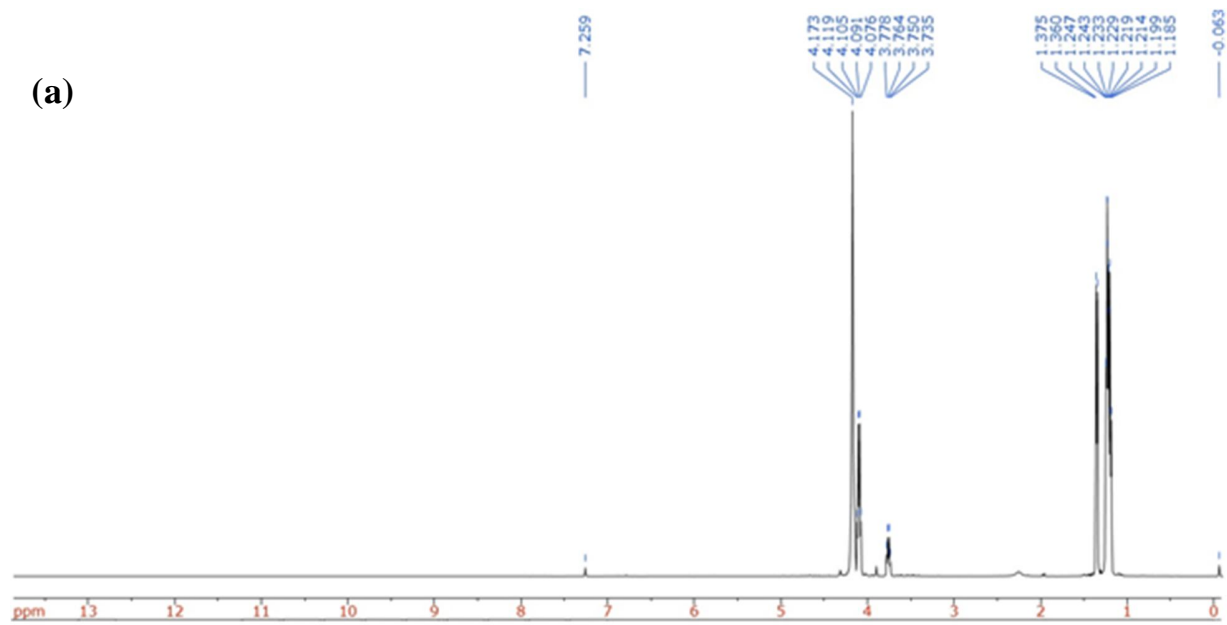

Chemical structure of the compound is shown above the spectrum. The structure is a complex molecule with various atoms labeled with letters A through J. The labels are: A (methyl of the first ester), B (CH of the first ester), C (CH<sub>2</sub> of the first ester), D (methyl of the second ester), E (methyl of the second ester), F (CH of the second ester), G (CH<sub>2</sub> of the second ester), H (methyl of the third ester), I (CH of the third ester), J (CH<sub>2</sub> of the third ester).

The spectrum shows peaks at the following chemical shifts (ppm): 169.634, 171.265, 172.577, 77.330, 77.075, 76.820, 68.097, 60.575, 60.538, 52.764, 16.188, 16.163, 14.020.

The peaks are labeled with letters: H, G, J, F, E, D, C, B, A.

<sup>1</sup>HNMR (500 MHz, CDCl<sub>3</sub>), δ (ppm) = 4.17(s, 4H, A), 4.09(q, 4H, J = 7.14 Hz, B), 3.75(q, 1H, J = 7.0 Hz, C), 1.36(d, 3H, J = 7.5 Hz, D), 1.20 – 1.22(m, 6H, E).

Compound 1 was analysed using a LC-MS (Agilent 1290 Infinity LC system coupled to Agilent 6520 Accurate-Mass Q-TOF mass spectrometer with dual ESI source) and the data are shown in Supplementary Figure S3.

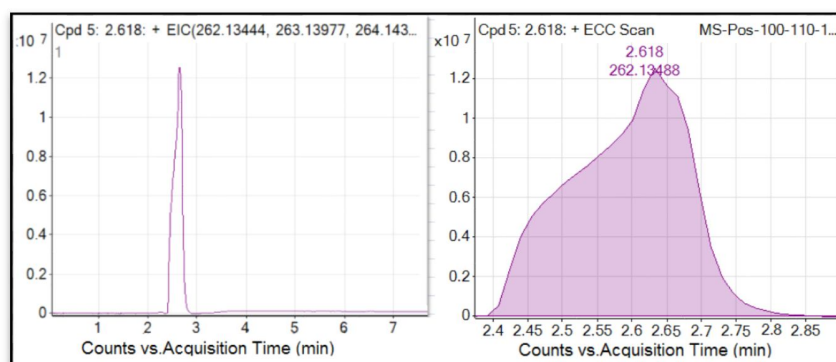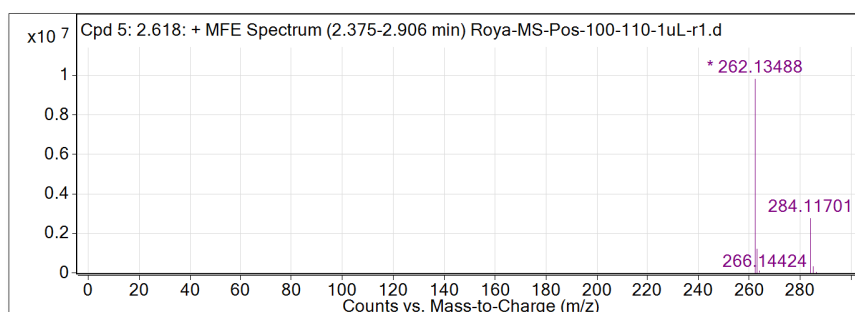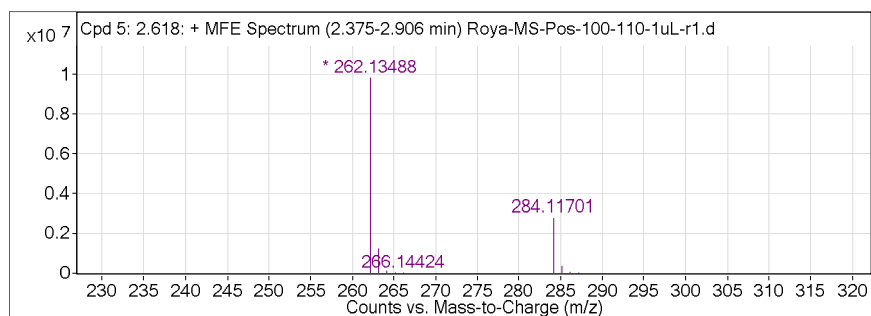

**MS Spectrum Peak List**

| <i>m/z</i> | <i>z</i> | Abundance  | Ion                 |
|------------|----------|------------|---------------------|
| 262.13488  | 1        | 9841889.00 | (M+H) <sup>+</sup>  |
| 263.13813  | 1        | 1222952.75 | (M+H) <sup>+</sup>  |
| 264.13983  | 1        | 111440.54  | (M+H) <sup>+</sup>  |
| 265.14235  | 1        | 9659.17    | (M+H) <sup>+</sup>  |
| 266.14424  | 1        | 0          | (M+H) <sup>+</sup>  |
| 284.11701  | 1        | 2789810.25 | (M+Na) <sup>+</sup> |
| 285.12010  | 1        | 364496.28  | (M+Na) <sup>+</sup> |
| 286.12157  | 1        | 55474.67   | (M+Na) <sup>+</sup> |
| 287.12385  | 1        | 4384.43    | (M+Na) <sup>+</sup> |

**Supplementary Figure S3.** Mass spectroscopy of compound 1. Molecular mass was reported as (M+H)<sup>+</sup> and (M+Na)<sup>+</sup>. The most abundant ions detected were 262.13488 Da (M+H)<sup>+</sup> and 284.11701 Da (M+Na)<sup>+</sup>. The calculated molecular mass by the Chemdraw software was 261.12 Da.

## 2. Synthesis of compound 2

Compound 1 (4.5 mg) in dichloromethane (DCM, 10 mL) was added with doxorubicin (DOX, 5 mg) and 4-Dimethylaminopyridine (DMAP, 5 mg). The mixture was kept in ice-bath for 30 minutes. Then, a solution of N,N'-Diisopropylcarbodiimide (DIC, 5 mg) in DCM (3 mL) was added to the above mixture and stirred for 3 h at room temperature (RT). Completion of the reaction was checked by TLC ( $\text{CHCl}_3$ :MeOH, 9:1) and visualized under UV light. The reaction completed after an overnight incubation. The mixture was filtered and the filtrate was evaporated under vacuum using a rotary evaporator. The product was extracted and purified using EtOAc (2×30 mL) and water (30 mL). The organic layer was then washed with brine and water. The organic layer was dried with  $\text{Na}_2\text{SO}_4$  and evaporated. The crude compound was purified using a flash chromatography ( $\text{CHCl}_3$ :MeOH, 8:2) and the yield of the product was 95%.

A solution of NaOMe (28%, 20  $\mu\text{L}$ ) was added to a solution of above deprotected compound (3 mg) in 60% aqueous  $\text{CH}_3\text{OH}$  (5 mL) and stirred for 1 h at RT. The reaction is depicted in Supplementary Figure S4. When the reaction was completed, the pH of the mixture was adjusted to 6-7 by adding 0.1 M HCl. Then the solvent was desalted using an ion exchange resin (Dowex 50WX8-200). The solvent was evaporated using a rotary evaporator under reduced pressure. The crude product was purified using flash column chromatography on silica gel ( $\text{CH}_3\text{Cl}$ : $\text{CH}_3\text{OH}$  8:2) to obtain compound 2 (NTA-DOX) with a yield of 85%.

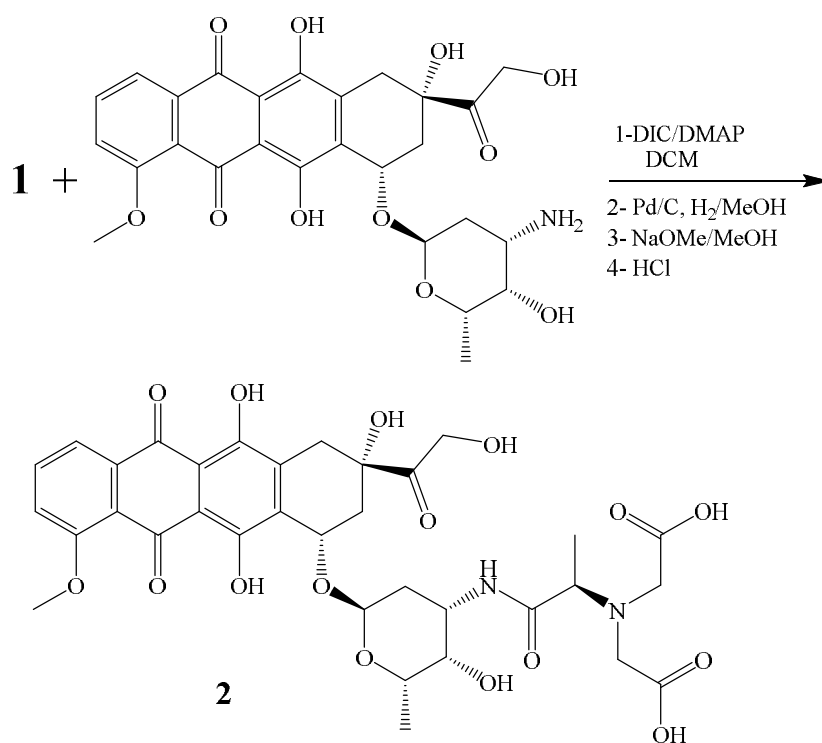

**Supplementary Figure S4.** Synthesis of NTA-DOX. Compound 1 in dichloromethane (DCM) was mixed with doxorubicin (DOX) in the presence of 4-Dimethylaminopyridine (DMAP) and *N,N'*-Diisopropylcarbodiimide (DIC) at RT for 3 h. Then the product was converted to the dicarboxylic-Ala-DOX (NTA-DOX) compound by the hydrolysis method using NaOMe in methanol.

The synthesised NTA-DOX was analysed using a nuclear magnetic resonance (NMR) spectrophotometer (Varian, 500 MHz). All <sup>1</sup>H and <sup>13</sup>C NMR spectra (Supplementary Figure S5) were recorded at 25°C in methanol-d<sub>4</sub>. Chemical shifts (δ) were reported in parts per million (ppm). Multiplicities are abbreviated as follows: s = singlet, d = doublet, t = triplet, q = quartet, m = multiplet.

(a)

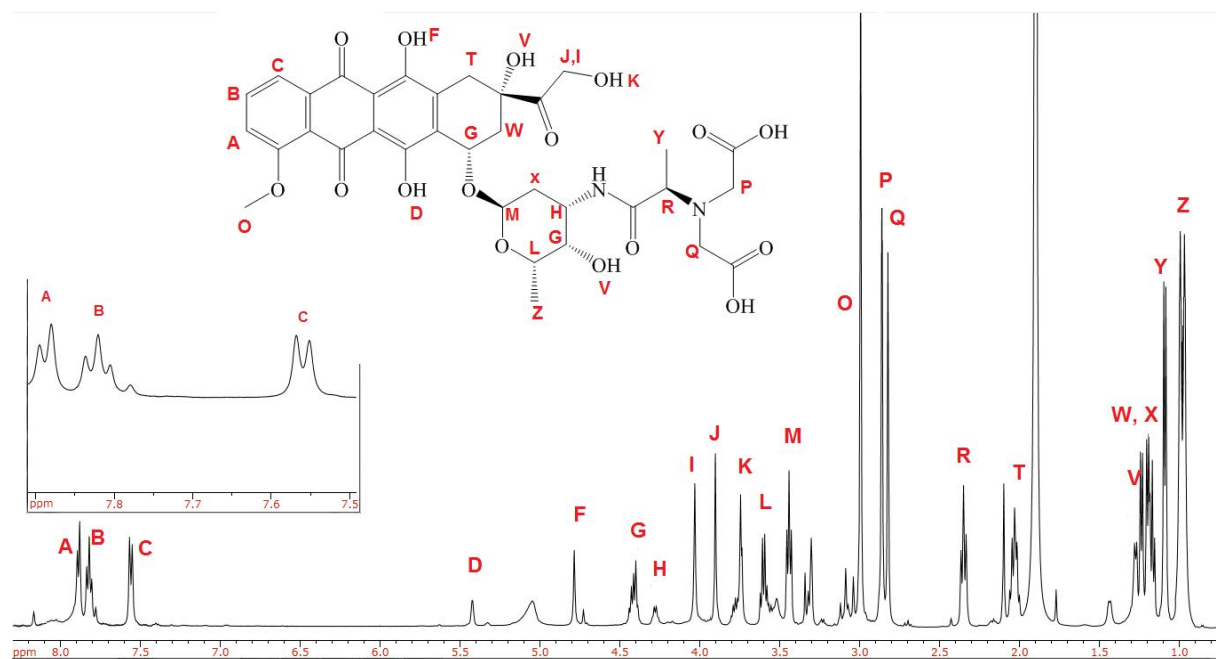

(b)

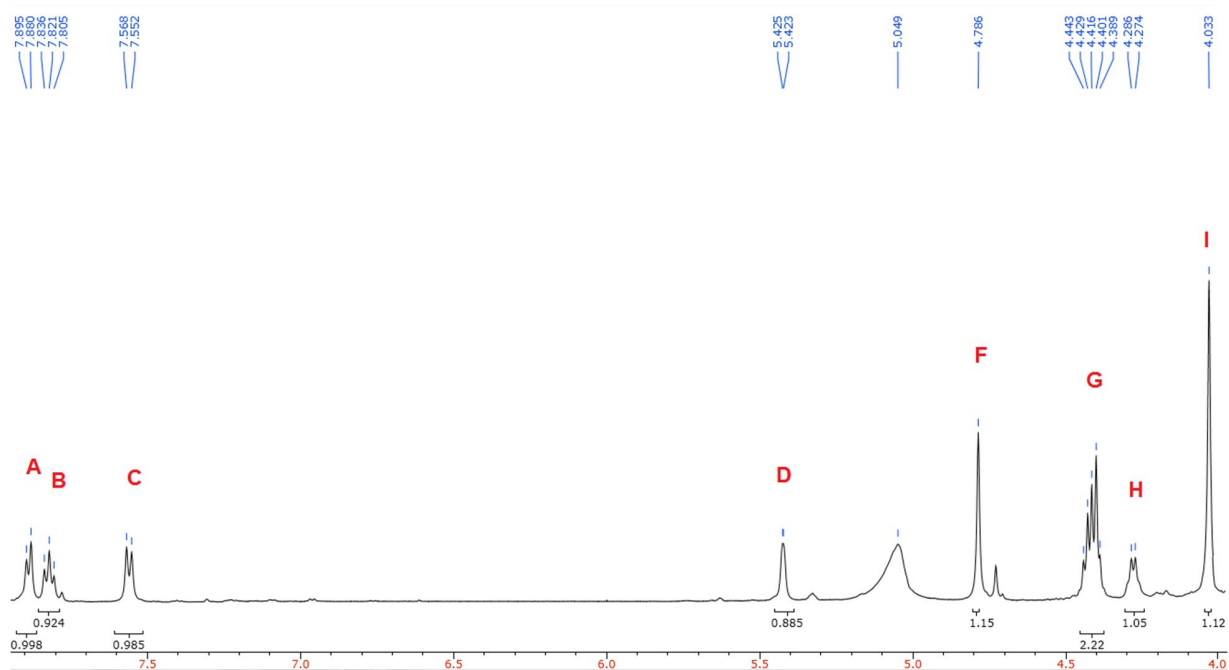

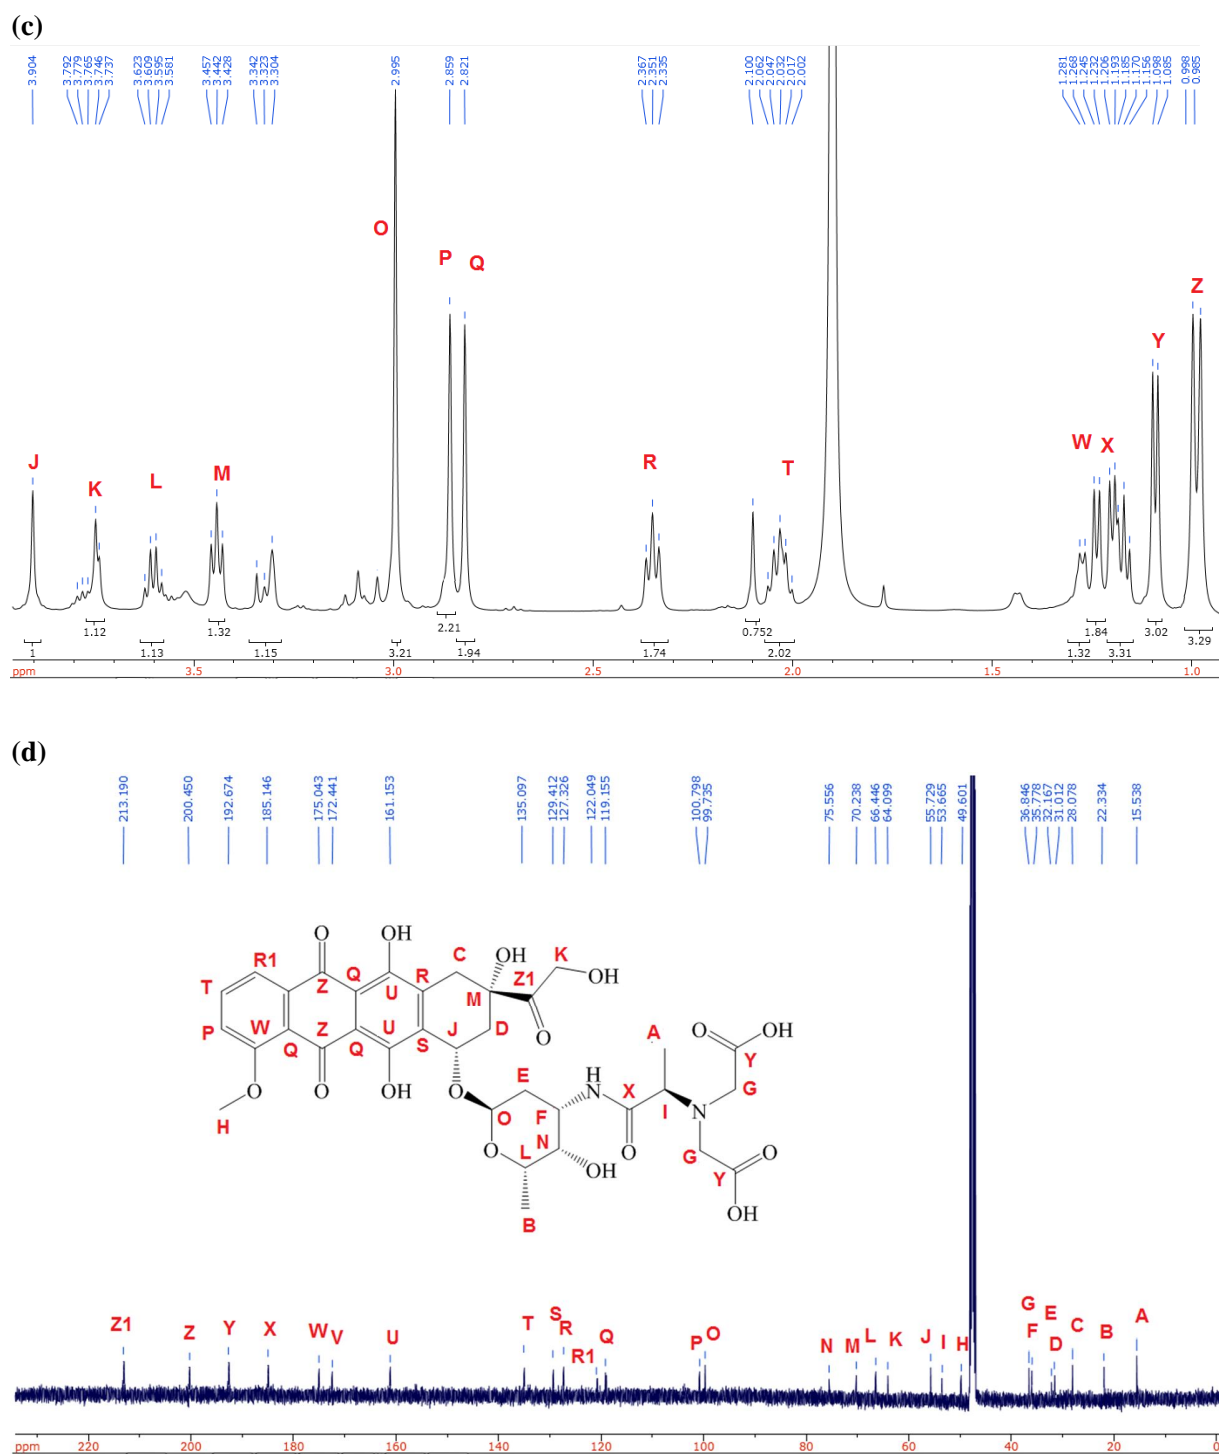

**Supplementary Figure S5.**  $^1\text{H}$ NMR and  $^{13}\text{C}$ NMR spectra of NTA-DOX. (a, b, and c)  $^1\text{H}$ NMR spectra of NTA-DOX, (d)  $^{13}\text{C}$ NMR of NTA-DOX.

<sup>1</sup>HNMR (500 MHz, CD<sub>3</sub>OD),  $\delta$  7.8(d, 1H, J = 7.38 Hz, A), 7.82(t, 1H, J = 7.87 Hz, B), 7.56(d, 1H, J = 8.25 Hz, C), 5.42(d, 1H, J = 1.1 Hz, D), 4.78(s, 1H, F), 4.41(dt, 2H, J = 13.67, 6.67 Hz, G), 4.27(d, 1H, J = 6.43 Hz, H), 4.03(s, 3H, I), 3.90(s, 1H, J), 3.76(s, 1H, K), 3.60(q, 1H, J = 7.00 Hz, L), 3.44(t, 1H, J = 7.06 Hz, M), 3.06(s, 3H, O), 2.99(s, 2H, P), 2.82(s, 2H, Q), 2.35(t, 2H, J = 8.04 Hz, R), 2.03(dt, 2H, J = 15.04, 7.54 Hz, T), 1.43(d, J = 5.59 Hz, U), 1.27(d, 1H, J = 6.59 Hz, V), 1.23-1.18(m, 3H, W), 1.09(d, 3H, J = 6.47 Hz, X), 0.99(d, 3H, J = 8.56 Hz, Y)

<sup>13</sup>CNMR (100 MHz, CD<sub>3</sub>OD), 15.53, 22.33, 28.07, 31.01, 32.16, 35.77, 36.84, 49.60, 53.66, 55.72, 64.09, 66.44, 70.23, 75.55, 99.73, 100.79, 119.15, 122.04, 127.32, 129.41, 135.09, 161.15, 172.44, 175.04, 185.14, 192.67, 200.45, 213.19.

NTA-DOX was analysed using a LC-MS (Agilent 1290 Infinity LC system coupled to Agilent 6520 Accurate-Mass Q-TOF mass spectrometer with dual ESI source) and the data are shown in Supplementary Figure S6.

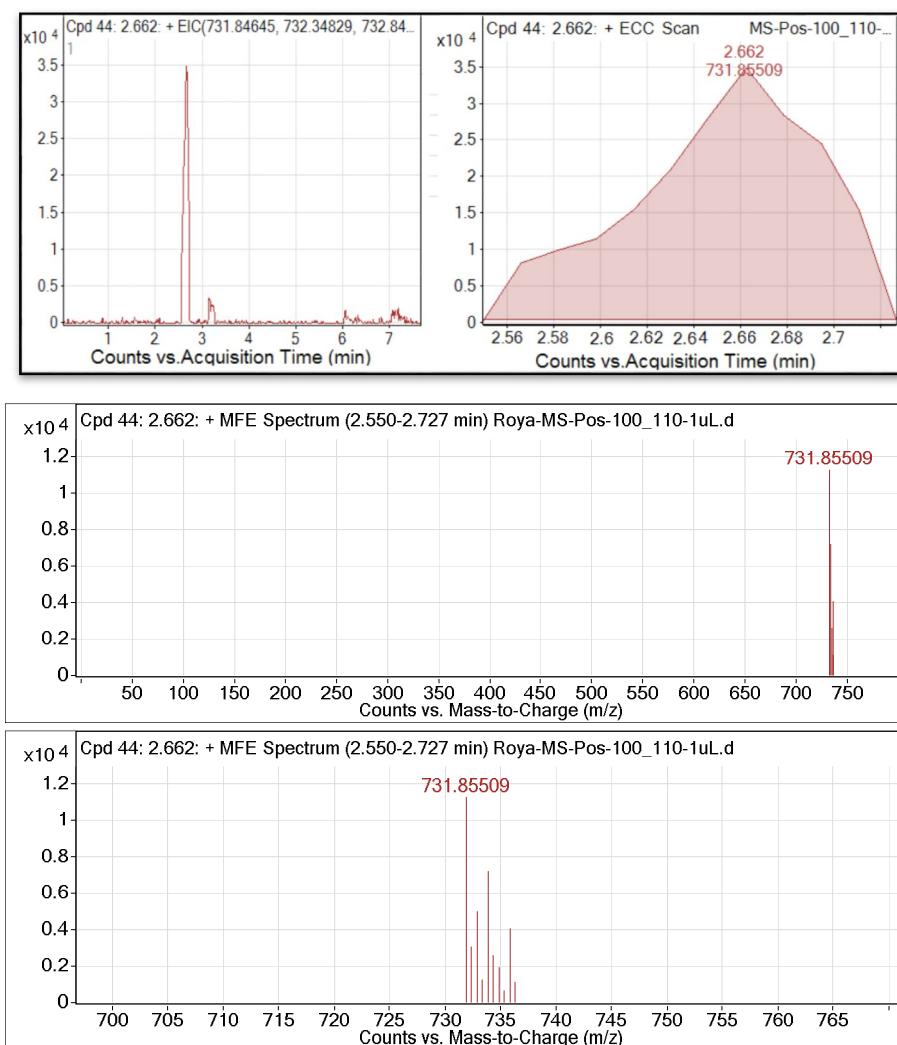

**MS Spectrum Peak List**

| <i>m/z</i> | <i>z</i> | Abundance | Ion                  |
|------------|----------|-----------|----------------------|
| 731.85509  | 2        | 11223.61  | (M+2H) <sup>+2</sup> |
| 732.35531  | 2        | 3091.22   | (M+2H) <sup>+2</sup> |
| 732.85150  | 2        | 4967.72   | (M+2H) <sup>+2</sup> |
| 733.35447  | 2        | 1258.55   | (M+2H) <sup>+2</sup> |
| 733.85727  | 2        | 7187.43   | (M+2H) <sup>+2</sup> |
| 734.35814  | 2        | 2611.45   | (M+2H) <sup>+2</sup> |
| 734.84584  | 2        | 1935.03   | (M+2H) <sup>+2</sup> |
| 735.34231  | 2        | 673.28    | (M+2H) <sup>+2</sup> |
| 735.85016  | 2        | 4069.64   | (M+2H) <sup>+2</sup> |
| 736.34987  | 2        | 1129.65   | (M+2H) <sup>+2</sup> |

**Supplementary Figure S6.** Mass spectroscopy of NTA-DOX. The most abundant ion detected was 731.85509 Da (M+2H)<sup>+2</sup>. The calculated molecular mass by the Chemdraw software was 730.22 Da.

## Cellular Uptake of Doxorubicin

OVCAR-3 and 3T3 cells ( $10^5$  cells per well) were seeded in six-well plates and incubated for 24 h. Then, free doxorubicin (DOX), HisHBcAg nanoparticles conjugated non-covalently with NTA-DOX (HisHBcAg-NTA-DOX), and HisHBcAg nanoparticles conjugated covalently with folic acid (FA) and non-covalently with NTA-DOX (FA-HisHBcAg-NTA-DOX) were added at equivalent DOX concentration (5  $\mu\text{g/mL}$ ). After washing 3 times with ice-cold PBS (pH 7.4), lysis buffer [50 mM Tris (pH 7.4), 0.8% Triton, 0.2% SDS] (0.5 mL per well) was added to lyse the cells. Internalised DOX was measured at  $A_{490}$  using a microplate reader (ELX 800; BioTeck Instruments, Winooski, VT, USA) and the results are shown in Supplementary Figure S7.

(a)

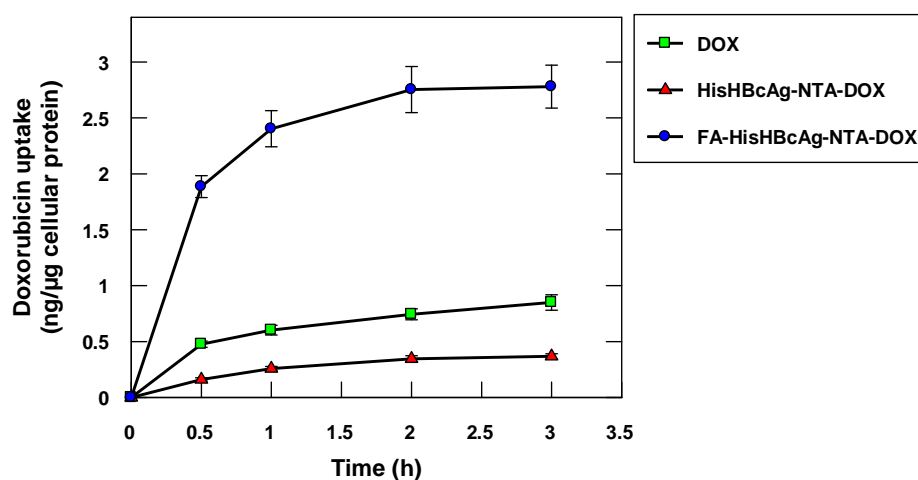

(b)

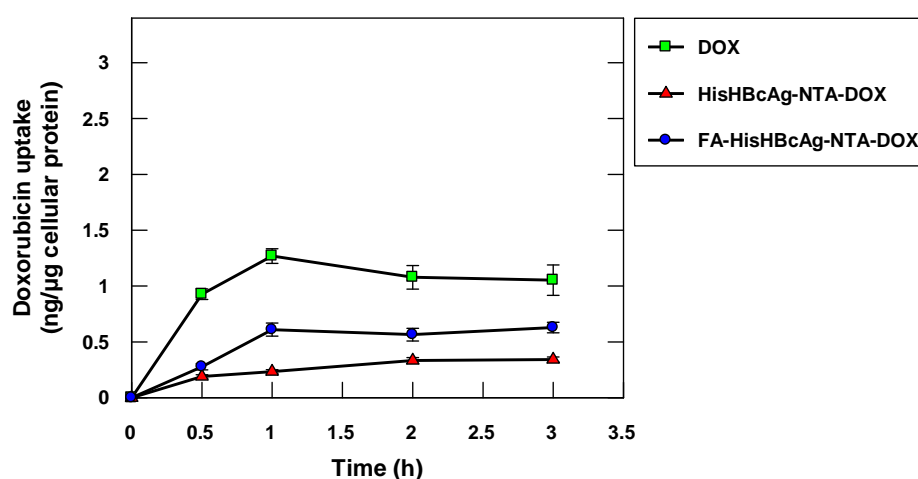

**Supplementary Figure S7.** Doxorubicin uptake by ovarian cancer and normal cells. Cellular uptake of doxorubicin by (a) cancer OVCAR-3, and (b) normal 3T3 cells incubated with free doxorubicin (DOX), HisHBcAg nanoparticles conjugated non-covalently with NTA-DOX (HisHBcAg-NTA-DOX), and HisHBcAg nanoparticles conjugated covalently with folic acid (FA) and non-covalently with NTA-DOX (FA-HisHBcAg-NTA-DOX). Data represent mean  $\pm$  SD of triplicate determinations.
